# Supplementary material for: Immunopathology of terminal complement activation and complement C5 blockade creating a pro‐survival and organ‐protective phenotype in trauma
Source: PubMed Central journal article supplement — Br J Pharmacol. 2022 Nov 15;180(4):422–40. doi: 10.1111/bph.15970 (PMC10100417; doi:10.1111/bph.15970), 2022-11-15
Supplement: BPH-180-422-s001.pdf [file BPH-180-422-s001.pdf]

1 **Supplementary Materials:**  
 2 **Supplementary Figures**

**Fig.S1**

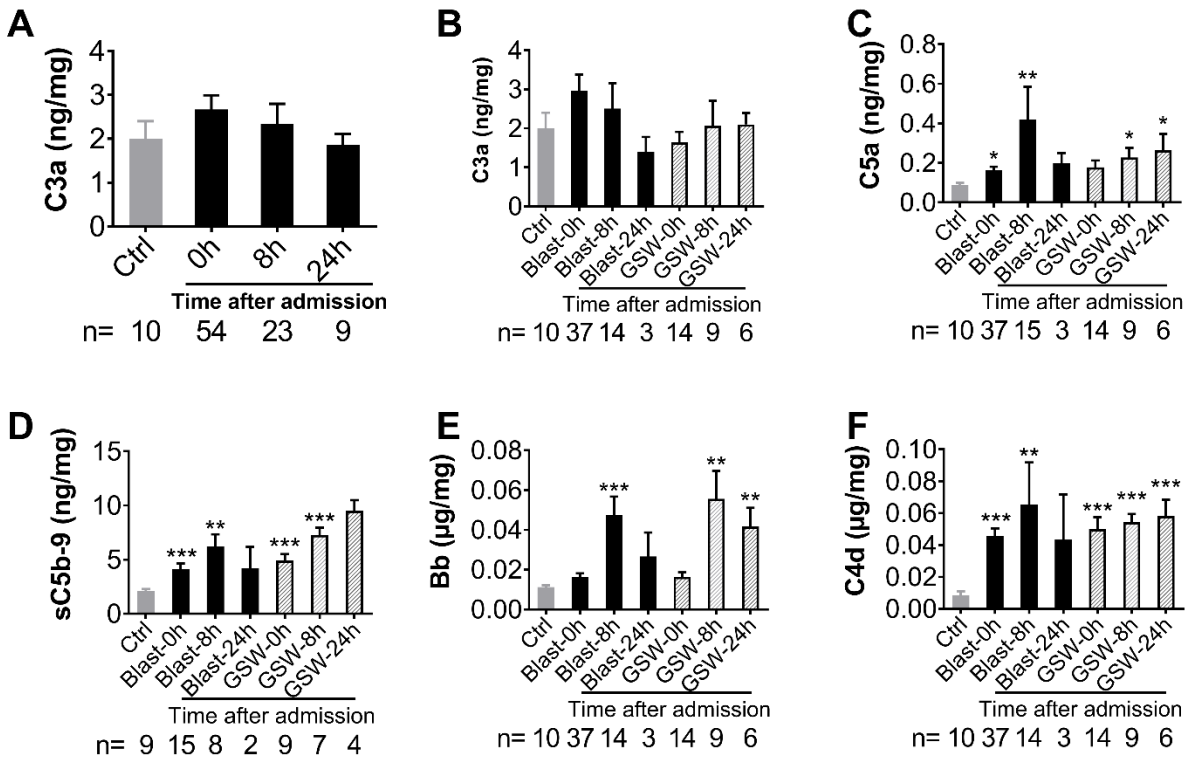

3

4 **Fig. S1. Systemic activation of the complement pathways in battlefield trauma. A-F,** plasma

5 levels of complement factors (C3a, C5a, sC5b-9, Bb, and C4d) were measured by ELISA in

6 healthy donors and trauma patients at admission to the hospital (0h), and at 8 and 24 hours after

7 admission. **A,** plasma levels of C3a for all admitted patients; **B-F,** plasma levels of complement

8 components in patients with two major mechanisms of injury - blast or gunshot wounds. The data

9 are expressed as nanograms (C3a, C5a, C5b-9) or microgram (Bb, C4d) per milligram of total

10 plasma proteins and presented as mean  $\pm$  SEM, \* =  $p < 0.05$ , \*\* =  $p < 0.01$ , \*\*\* =  $p < 0.001$  vs.

11 Healthy.

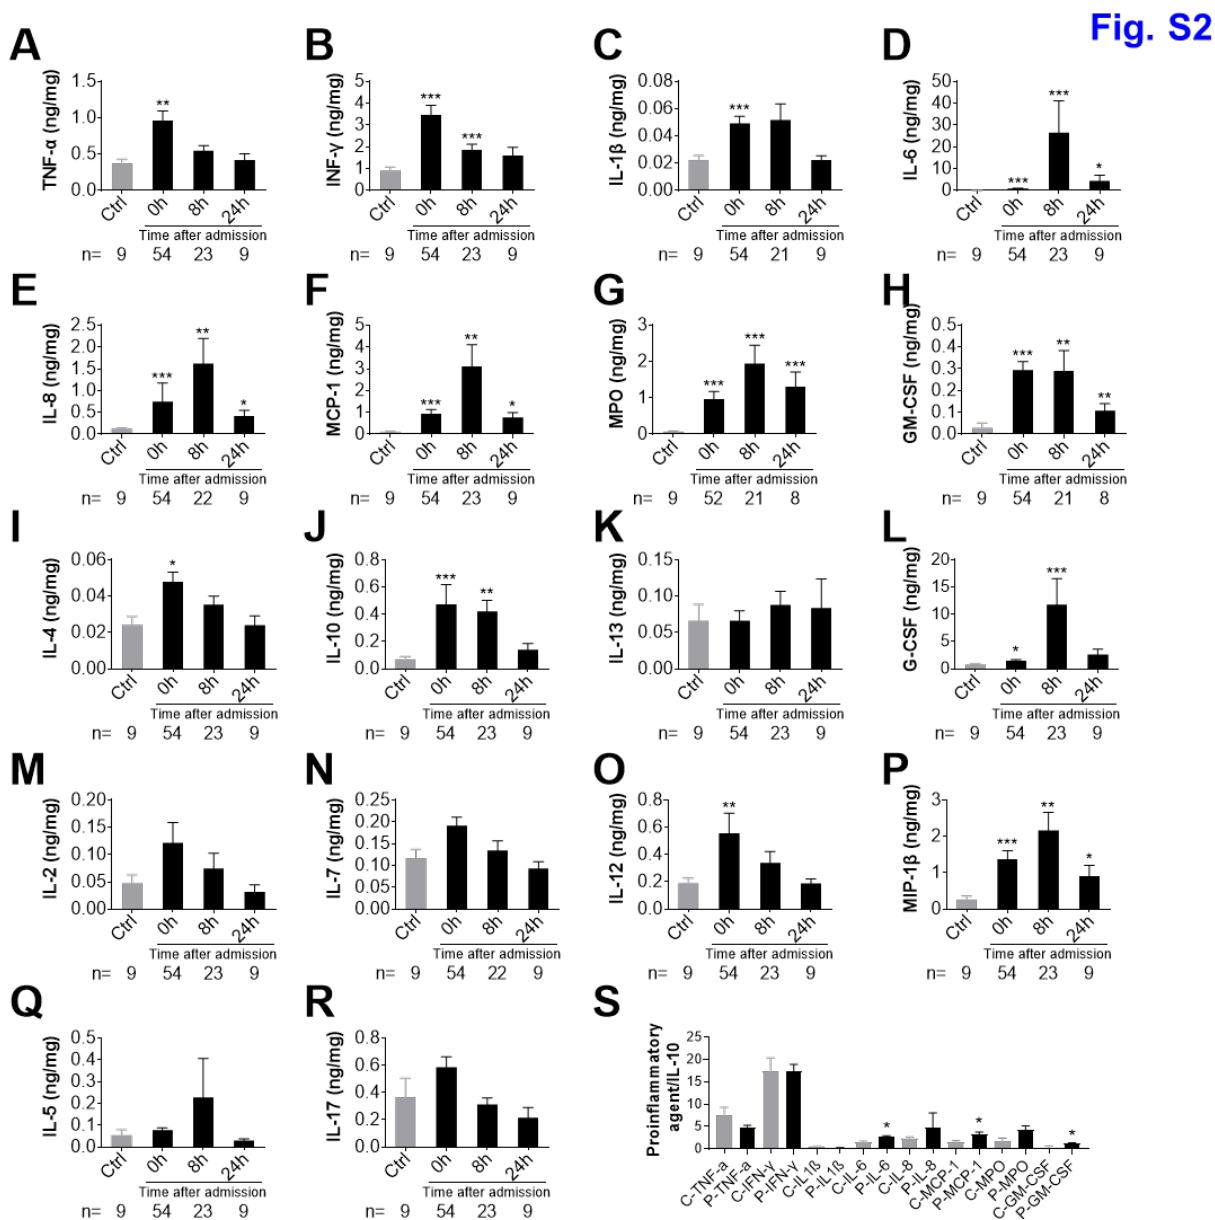

12

13 **Fig. S2. Systemic inflammatory response to trauma.** Inflammatory factors and cytokines were  
 14 measured by ELISA and by Bio-Plex Kits, respectively. Pro-inflammatory factors/cytokines (**A-**  
 15 **H**), anti-inflammatory cytokines (**I-L**), and regulatory cytokines (**M-R**) from healthy donors  
 16 (n=10) and trauma patients on admission (n=54), and at 8 (n=23) and 24 hours (n=9) after  
 17 admission were presented. The data are expressed as nanogram per milligram plasma protein and

18 presented as mean  $\pm$  SEM, \*= p<0.05, \*\*=p<0.01, \*\*\* = p<0.001 vs. Healthy. Pro-inflammatory  
19 versus anti-inflammatory response (S). The ratio of systemic inflammatory factors (TNF- $\alpha$ , IFN-  
20  $\gamma$ , IL-1 $\beta$ , IL-6, IL-8, MCP-1, MPO, and GM-CSF) to IL-10 on admission is given. C, Healthy  
21 controls (n=10); P, trauma patients (n=54). \*= p < 0.05 vs. respective control (Unpaired t- test  
22 with Welch's correction).

23

24

25

26

27

28

29

30

31

32

33

34

35

Fig.S3

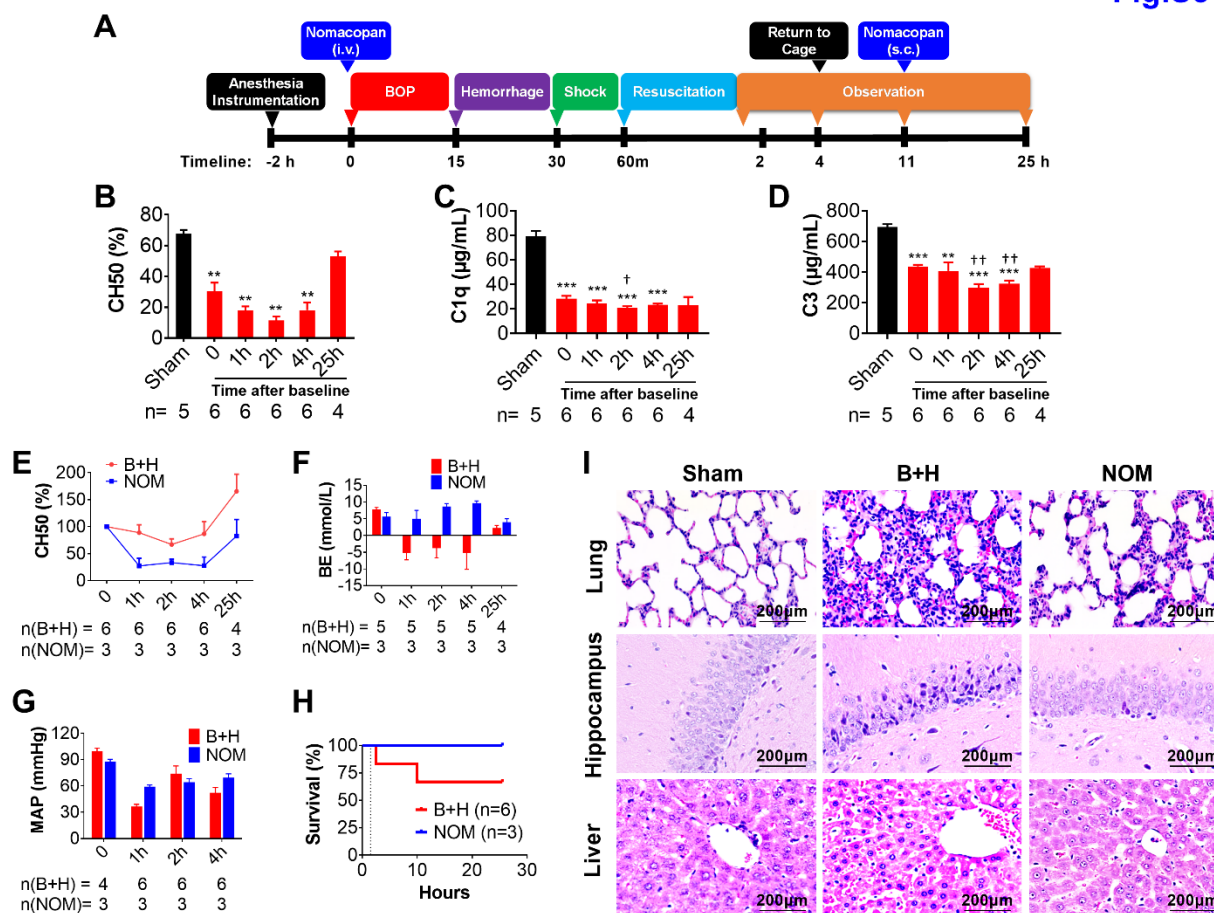

36

37 **Fig. S3. Preventive effects of nomacopan treatment on the acidosis, hemodynamics, tissue**  
 38 **damage, and survival after blast injury and hemorrhage in rats (Pilot study). (A)**  
 39 **Experimental design.** Anesthetized male rats were subjected to a moderate blast overpressure  
 40 (BOP =  $111.65 \pm 2$  kPa,  $t_+ = 3.16 \pm 0.03$  ms, impulse =  $143 \pm 2.26$  kPa-ms) and a controlled  
 41 hemorrhage (40% blood volume). After 30 min of shock, animals were resuscitated with Plasma-  
 42 Lyte A ( $2 \times$  shed blood volume). Animals were randomized to three study arms: nomacopan (15  
 43 mg/kg, n=3), B + H (saline, n=6) and Sham (no injury, n=4). The first dose of nomacopan (7.5  
 44 mg/kg, i.v.) and a repeated dose of nomacopan (7.5 mg/kg, s.c.) were given immediately before  
 45 blast injury and at 11 hours after blast injury, respectively. Blood pressure was monitored and

46 recorded with the BIOPAC MP160 Data Acquisition and Analysis Systems via the carotid  
47 arterial catheter. Blood and tissue samples were collected for blood complement/chemistry  
48 analysis and histopathological evaluation, respectively. **(B-D)** Bar graphs showing serum CH50,  
49 and plasma concentrations of C1q and C3, respectively. The data were presented as mean  $\pm$  SEM,  
50  $*=p<0.05$ ,  $**=p<0.01$ ,  $***=p<0.001$  vs. Sham,  $\dagger=p<0.05$ ,  $\dagger\dagger=p<0.01$  vs. baseline (0 hour; by  
51 Mann-Whitney U test). **(E-G)** Bar graphs displaying the effect of nomacopan on CH50, BE, and  
52 MAP, respectively. The data were presented as mean  $\pm$  SEM. **(H)** Effect of nomacopan treatment  
53 on survival. **(I)** Representative H & E images show the effect of nomacopan on histological  
54 changes of the organs. Labels: B+H = blast overpressure (BOP) + hemorrhage; NOM =  
55 nomacopan *i.v.* + BOP + hemorrhage + nomacopan *s.c.*; MAP = mean arterial pressure; BE=  
56 base excess/base deficit.

57

58

59

60

61

62

63

64

Fig.S4

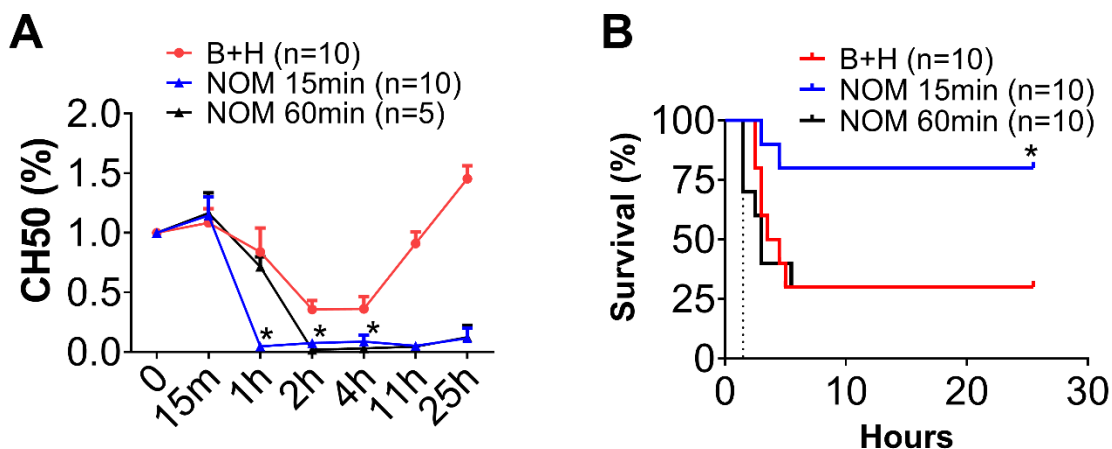

65

66 **Fig. S4. Complement hemolytic activity and nomacopan effect on survival dependent on its**  
 67 **administration time.** Experimental groups: All animals were subjected to blast and hemorrhage,  
 68 and treated with vehicle (saline, B+H group) or nomacopan; B + H = blast + hemorrhage; NOM  
 69 = blast + nomacopan *i.v.* + hemorrhage + nomacopan *s.c.* in resuscitation phase; NOM-Late =  
 70 nomacopan *i.v.*, with the first dose was infused at the end of hemorrhagic shock, immediately  
 71 before fluid resuscitation + nomacopan *s.c.* with the second dose was given in the resuscitation  
 72 phase; *i.v.* = intravenous; *s.c.* = subcutaneous. **A**, the CH50 test data throughout the observation  
 73 period; **B**, the survival distribution for three experimental groups was compared using the log-  
 74 rank Mantel-Cox test; \*=  $p < 0.05$ . NOM, nomacopan.

75

76

77

78

|                | C3a         |             | C5a         |             | C5b-9       |             | Bb          |             | C4d          |             |
|----------------|-------------|-------------|-------------|-------------|-------------|-------------|-------------|-------------|--------------|-------------|
|                | <i>r</i>    | <i>p</i>    | <i>r</i>    | <i>p</i>    | <i>r</i>    | <i>p</i>    | <i>r</i>    | <i>p</i>    | <i>r</i>     | <i>p</i>    |
| Eotaxin        | -0.13       | 0.76        | 0.18        | 0.70        | 0.16        | 0.73        | -0.18       | 0.48        | -0.03        | 0.89        |
| FGF basic      | -0.57       | 0.20        | 0.11        | 0.84        | -0.07       | 0.91        | -0.06       | 0.74        | -0.27        | 0.53        |
| G-CSF          | -0.07       | 0.62        | -0.09       | 0.52        | -0.14       | 0.49        | -0.11       | 0.43        | -0.07        | 0.60        |
| GM-CSF         | 0.13        | 0.35        | 0.09        | 0.50        | -0.04       | 0.85        | 0.00        | 0.99        | -0.22        | 0.12        |
| IFN- $\gamma$  | -0.09       | 0.51        | -0.05       | 0.75        | -0.10       | 0.64        | -0.13       | 0.36        | -0.25        | 0.07        |
| IL-1 $\beta$   | 0.05        | 0.71        | -0.14       | 0.32        | -0.25       | 0.22        | -0.09       | 0.50        | n/a          | n/a         |
| IL-1ra         | 0.54        | 0.24        | -0.54       | 0.24        | -0.04       | 0.96        | -0.42       | 0.23        | 0.69         | 0.10        |
| IL-2           | 0.07        | 0.62        | 0.06        | 0.67        | -0.22       | 0.29        | -0.09       | 0.54        | -0.02        | 0.86        |
| IL-4           | -0.11       | 0.43        | -0.04       | 0.80        | -0.24       | 0.23        | -0.17       | 0.21        | -0.21        | 0.13        |
| IL-5           | -0.14       | 0.33        | -0.01       | 0.96        | -0.17       | 0.39        | -0.09       | 0.51        | <b>-0.27</b> | <b>0.05</b> |
| IL-6           | <b>0.45</b> | <b>0.00</b> | n/a         | n/a         | n/a         | n/a         | n/a         | n/a         | 0.17         | 0.23        |
| IL-7           | -0.12       | 0.37        | -0.20       | 0.14        | -0.22       | 0.28        | -0.22       | 0.11        | -0.25        | 0.06        |
| IL-8           | 0.09        | 0.54        | 0.08        | 0.54        | 0.18        | 0.39        | 0.08        | 0.56        | -0.09        | 0.51        |
| IL-9           | -0.43       | 0.35        | 0.07        | 0.91        | 0.00        | >1.00       | -0.06       | 0.74        | -0.22        | 0.61        |
| IL-10          | <b>0.35</b> | <b>0.01</b> | <b>0.40</b> | <b>0.00</b> | 0.34        | 0.09        | <b>0.31</b> | <b>0.02</b> | 0.00         | 0.97        |
| IL-12          | -0.23       | 0.09        | -0.01       | 0.96        | 0.06        | 0.75        | -0.15       | 0.29        | -0.21        | 0.12        |
| IL-13          | 0.08        | 0.57        | 0.10        | 0.48        | -0.02       | 0.93        | 0.18        | 0.19        | -0.26        | 0.06        |
| IL-15          | 0.11        | 0.84        | -0.18       | 0.71        | 0.04        | 0.96        | -0.30       | 0.40        | 0.18         | 0.70        |
| IL-17          | -0.16       | 0.25        | -0.05       | 0.70        | -0.26       | 0.20        | -0.16       | 0.25        | n/a          | n/a         |
| IP-10          | -0.25       | 0.59        | 0.36        | 0.44        | 0.18        | 0.71        | -0.36       | 0.29        | -0.27        | 0.53        |
| MCP-1          | <b>0.29</b> | <b>0.03</b> | n/a         | n/a         | n/a         | n/a         | n/a         | n/a         | -0.02        | 0.89        |
| MPO            | <b>0.34</b> | <b>0.01</b> | n/a         | n/a         | n/a         | n/a         | n/a         | n/a         | 0.00         | 0.97        |
| MIP-1 $\alpha$ | -0.64       | 0.14        | 0.39        | 0.40        | 0.14        | 0.78        | 0.30        | 0.55        | -0.45        | 0.29        |
| MIP-1 $\beta$  | 0.26        | 0.06        | 0.23        | 0.10        | <b>0.52</b> | <b>0.01</b> | <b>0.29</b> | <b>0.03</b> | 0.00         | 0.97        |
| PDGF-bb        | 0.11        | 0.84        | 0.04        | 0.96        | 0.18        | 0.71        | -0.42       | 0.23        | 0.36         | 0.42        |
| RANTES         | 0.57        | 0.20        | 0.32        | 0.50        | 0.71        | 0.09        | 0.18        | 0.74        | 0.31         | 0.50        |
| TNF- $\alpha$  | -0.06       | 0.66        | -0.12       | 0.37        | -0.23       | 0.25        | -0.13       | 0.33        | n/a          | n/a         |
| VEGF           | -0.11       | 0.84        | 0.32        | 0.50        | 0.39        | 0.40        | 0.18        | 0.74        | -0.11        | 0.79        |

81 **Table S1. Correlations of complement and inflammatory mediators/cytokines/chemokines.**

82 Abbreviations: FGF basic, basic fibroblast growth factor; G-CSF, granulocyte-colony stimulating

83 factor; GM-CSF, granulocyte-macrophage colony-stimulating factor; MCP-1, monocyte

84 chemoattractant protein-1; MPO, myeloperoxidase; MIP, macrophage inflammatory protein;

85 PDGF-bb, platelet-derived growth factor-BB; RANTES, regulated on activation, normal T cell

86 expressed and secreted; VEGF, vascular endothelial growth factor. n/a, not applicable. The

87 correlation analyses were performed by Spearman's rank correlation. A significant correlation

88 ( $p < 0.05$ ) is indicated by boldface type.

Table S2

|           | Base Deficit |      | GCS          |                   | ISS         |                  | MAP          |             | SIRS score  |             | RBC          |             | PLT units    |                  | FFP units    |             | Crystalloids |             |
|-----------|--------------|------|--------------|-------------------|-------------|------------------|--------------|-------------|-------------|-------------|--------------|-------------|--------------|------------------|--------------|-------------|--------------|-------------|
|           | r            | p    | r            | p                 | r           | p                | r            | p           | r           | p           | r            | p           | r            | p                | r            | p           | r            | p           |
| C3a       | -0.30        | 0.15 | -0.26        | 0.06              | <b>0.36</b> | <b>0.01</b>      | -0.01        | 0.92        | 0.18        | 0.25        | <b>0.31</b>  | <b>0.03</b> | 0.24         | 0.10             | <b>0.37</b>  | <b>0.01</b> | 0.07         | 0.63        |
| C5a       | 0.00         | 1.00 | -0.24        | 0.09              | <b>0.57</b> | <b>&lt;0.001</b> | -0.23        | 0.09        | 0.14        | 0.36        | <b>0.43</b>  | <b>0.00</b> | 0.24         | 0.09             | 0.26         | 0.06        | <b>0.29</b>  | <b>0.04</b> |
| C5b-9     | -0.12        | 0.70 | -0.25        | 0.22              | 0.32        | 0.12             | -0.03        | 0.90        | 0.03        | 0.89        | 0.26         | 0.22        | 0.25         | 0.22             | 0.09         | 0.66        | <b>0.43</b>  | <b>0.03</b> |
| Bb        | -0.16        | 0.45 | -0.22        | 0.11              | <b>0.41</b> | <b>0.00</b>      | 0.15         | 0.28        | 0.27        | 0.09        | <b>0.49</b>  | <b>0.00</b> | 0.21         | 0.15             | <b>0.41</b>  | <b>0.00</b> | <b>0.35</b>  | <b>0.01</b> |
| C4d       | 0.15         | 0.49 | <b>-0.28</b> | <b>0.04</b>       | -0.14       | 0.34             | 0.21         | 0.14        | -0.04       | 0.80        | <b>-0.29</b> | <b>0.04</b> | <b>-0.28</b> | <b>0.046</b>     | <b>-0.35</b> | <b>0.01</b> | 0.03         | 0.83        |
| MPO       | 0.03         | 0.89 | -0.19        | 0.20              | <b>0.33</b> | <b>0.02</b>      | -0.03        | 0.83        | <b>0.37</b> | <b>0.02</b> | <b>0.47</b>  | <b>0.00</b> | 0.17         | 0.24             | <b>0.36</b>  | <b>0.01</b> | <b>0.35</b>  | <b>0.01</b> |
| Eotaxin   | -0.80        | 0.33 | -0.45        | 0.10              | -0.18       | 0.67             | -0.27        | 0.53        | -0.50       | 0.33        | 0.15         | 0.73        | <b>-0.41</b> | <b>&lt;0.001</b> | 0.02         | 0.92        | -0.40        | 0.36        |
| FGF basic | -1.00        | 0.08 | <b>-0.76</b> | <b>&lt; 0.001</b> | 0.21        | 0.66             | -0.54        | 0.24        | -0.11       | 0.83        | 0.67         | 0.12        | <b>-0.61</b> | <b>&lt;0.001</b> | 0.58         | 0.19        | -0.21        | 0.66        |
| G-CSF     | 0.22         | 0.30 | <b>-0.29</b> | <b>0.04</b>       | <b>0.30</b> | <b>0.03</b>      | -0.10        | 0.47        | 0.03        | 0.83        | <b>0.29</b>  | <b>0.04</b> | 0.08         | 0.56             | 0.06         | 0.65        | 0.03         | 0.82        |
| GM-CSF    | 0.35         | 0.09 | <b>-0.48</b> | <b>0.00</b>       | <b>0.28</b> | <b>0.04</b>      | -0.23        | 0.09        | 0.01        | 0.95        | <b>0.34</b>  | <b>0.02</b> | 0.10         | 0.46             | <b>0.34</b>  | <b>0.01</b> | -0.09        | 0.54        |
| IFN-γ     | 0.29         | 0.16 | <b>-0.28</b> | <b>0.05</b>       | 0.18        | 0.19             | <b>-0.31</b> | <b>0.02</b> | -0.09       | 0.55        | 0.21         | 0.13        | 0.06         | 0.68             | 0.11         | 0.42        | -0.07        | 0.62        |
| IL-1β     | 0.36         | 0.08 | <b>-0.39</b> | <b>0.00</b>       | 0.27        | 0.05             | <b>-0.27</b> | <b>0.05</b> | -0.09       | 0.57        | <b>0.39</b>  | <b>0.00</b> | 0.21         | 0.14             | <b>0.27</b>  | <b>0.05</b> | 0.01         | 0.92        |
| IL-1ra    | -0.40        | 0.75 | -0.27        | 0.29              | -0.39       | 0.40             | -0.61        | 0.17        | 0.63        | 0.50        | 0.16         | 0.73        | <b>-0.61</b> | <b>&lt;0.001</b> | 0.58         | 0.19        | -0.21        | 0.66        |
| IL-2      | -0.24        | 0.27 | -0.09        | 0.55              | 0.15        | 0.29             | -0.12        | 0.38        | -0.01       | 0.96        | 0.14         | 0.34        | -0.01        | 0.93             | -0.07        | 0.60        | 0.10         | 0.50        |
| IL-4      | 0.11         | 0.62 | <b>-0.32</b> | <b>0.02</b>       | 0.27        | 0.05             | <b>-0.35</b> | <b>0.01</b> | 0.09        | 0.55        | <b>0.32</b>  | <b>0.02</b> | 0.15         | 0.28             | 0.12         | 0.37        | 0.00         | 0.99        |
| IL-5      | 0.20         | 0.36 | <b>-0.33</b> | <b>0.02</b>       | <b>0.30</b> | <b>0.03</b>      | <b>-0.33</b> | <b>0.02</b> | 0.03        | 0.85        | <b>0.31</b>  | <b>0.03</b> | 0.14         | 0.32             | 0.11         | 0.45        | -0.03        | 0.83        |
| IL-6      | 0.25         | 0.25 | -0.26        | 0.07              | <b>0.35</b> | <b>0.01</b>      | -0.03        | 0.83        | 0.20        | 0.20        | <b>0.42</b>  | <b>0.00</b> | 0.12         | 0.37             | <b>0.30</b>  | <b>0.03</b> | <b>0.31</b>  | <b>0.03</b> |
| IL-7      | 0.33         | 0.11 | -0.26        | 0.06              | 0.21        | 0.13             | <b>-0.38</b> | <b>0.00</b> | -0.05       | 0.73        | 0.20         | 0.17        | 0.15         | 0.29             | 0.06         | 0.66        | -0.13        | 0.36        |
| IL-8      | 0.21         | 0.33 | <b>-0.36</b> | <b>0.01</b>       | <b>0.41</b> | <b>0.00</b>      | <b>-0.28</b> | <b>0.04</b> | 0.18        | 0.25        | <b>0.41</b>  | <b>0.00</b> | 0.20         | 0.15             | 0.25         | 0.07        | 0.11         | 0.46        |
| IL-9      | -1.00        | 0.08 | <b>-0.76</b> | <b>&lt; 0.001</b> | 0.04        | 0.96             | -0.50        | 0.27        | 0.11        | >1.00       | 0.67         | 0.12        | <b>-0.61</b> | <b>&lt;0.001</b> | 0.58         | 0.19        | -0.25        | 0.59        |
| IL-10     | 0.17         | 0.42 | <b>-0.33</b> | <b>0.02</b>       | <b>0.37</b> | <b>0.01</b>      | -0.10        | 0.46        | 0.15        | 0.35        | <b>0.43</b>  | <b>0.00</b> | 0.07         | 0.62             | <b>0.30</b>  | <b>0.03</b> | 0.26         | 0.07        |
| IL-12     | 0.28         | 0.18 | -0.20        | 0.15              | 0.14        | 0.31             | <b>-0.32</b> | <b>0.02</b> | -0.18       | 0.26        | 0.15         | 0.31        | 0.15         | 0.27             | 0.01         | 0.97        | 0.00         | 0.99        |
| IL-13     | 0.01         | 0.97 | <b>-0.32</b> | <b>0.02</b>       | 0.22        | 0.12             | 0.03         | 0.83        | -0.09       | 0.59        | <b>0.36</b>  | <b>0.01</b> | 0.13         | 0.35             | 0.24         | 0.08        | 0.18         | 0.21        |
| IL-15     | -1.00        | 0.08 | -0.45        | 0.14              | -0.43       | 0.35             | -0.36        | 0.44        | 0.32        | 0.67        | 0.23         | 0.61        | <b>-0.61</b> | <b>&lt;0.001</b> | 0.32         | 0.49        | -0.43        | 0.35        |
| IL-17     | 0.08         | 0.69 | <b>-0.38</b> | <b>0.01</b>       | <b>0.33</b> | <b>0.02</b>      | <b>-0.40</b> | <b>0.00</b> | 0.12        | 0.44        | <b>0.36</b>  | <b>0.01</b> | 0.14         | 0.30             | 0.17         | 0.22        | 0.07         | 0.64        |
| IP-10     | -0.80        | 0.33 | <b>-0.67</b> | <b>&lt; 0.001</b> | 0.21        | 0.66             | -0.39        | 0.40        | -0.74       | 0.17        | 0.22         | 0.64        | <b>-0.41</b> | <b>&lt;0.001</b> | 0.22         | 0.63        | -0.64        | 0.14        |
| MCP-1     | 0.22         | 0.31 | <b>-0.33</b> | <b>0.02</b>       | <b>0.40</b> | <b>0.00</b>      | -0.16        | 0.24        | 0.05        | 0.74        | <b>0.45</b>  | <b>0.00</b> | 0.24         | 0.08             | <b>0.43</b>  | <b>0.00</b> | 0.18         | 0.21        |
| MIP-1α    | -0.80        | 0.33 | <b>-0.76</b> | <b>&lt; 0.001</b> | 0.50        | 0.27             | -0.46        | 0.30        | 0.21        | 0.83        | <b>0.85</b>  | <b>0.03</b> | <b>-0.20</b> | <b>&lt;0.001</b> | 0.58         | 0.19        | 0.14         | 0.78        |
| MIP-1β    | 0.35         | 0.09 | -0.22        | 0.12              | 0.18        | 0.21             | -0.19        | 0.16        | -0.02       | 0.91        | <b>0.29</b>  | <b>0.04</b> | 0.14         | 0.31             | <b>0.36</b>  | <b>0.01</b> | 0.20         | 0.17        |
| PDGF-bb   | -0.80        | 0.33 | <b>-0.58</b> | <b>0.05</b>       | -0.04       | 0.96             | -0.71        | 0.09        | -0.74       | 0.17        | 0.18         | 0.70        | <b>-0.61</b> | <b>&lt;0.001</b> | 0.30         | 0.52        | -0.43        | 0.35        |
| RANTES    | 0.40         | 0.75 | -0.27        | 0.29              | -0.32       | 0.50             | -0.21        | 0.66        | 0.32        | 0.67        | 0.18         | 0.70        | 0.20         | 0.57             | -0.02        | 0.88        | 0.07         | 0.91        |
| TNF-α     | 0.27         | 0.20 | <b>-0.31</b> | <b>0.03</b>       | 0.21        | 0.13             | <b>-0.28</b> | <b>0.04</b> | -0.07       | 0.67        | <b>0.29</b>  | <b>0.04</b> | 0.11         | 0.41             | 0.14         | 0.32        | 0.00         | 0.99        |
| VEGF      | -0.80        | 0.33 | -0.58        | 0.05              | -0.18       | 0.71             | -0.29        | 0.56        | -0.21       | 0.67        | 0.50         | 0.25        | <b>-0.20</b> | <b>&lt;0.001</b> | 0.19         | 0.70        | -0.07        | 0.91        |

90

91 **Table S2. Table S2. Correlations between complement/inflammatory cytokines/chemokines**  
92 **and clinical outcomes.** Abbreviations: MPO, myeloperoxidase; FGF basic, basic fibroblast  
93 growth factor; G-CSF, granulocyte-colony stimulating factor; GM-CSF, granulocyte-  
94 macrophage colony-stimulating factor. MCP-1, monocyte chemoattractant protein-1 (also known  
95 as CCL2); MIP, macrophage inflammatory protein (also known as CCL3); PDGF-bb, platelet-  
96 derived growth factor-BB; RANTES, regulated on activation, normal T cell expressed and  
97 Secreted (also known as CCL5); VEGF, vascular endothelial growth factor. n/a, not applicable.  
98 The correlation analyses were performed by Spearman's rank correlation. A significant  
99 correlation ( $p<0.05$ ) is indicated by boldface type.



101

102

**Table S3**

|                    | Reference     |             |               | Overpressure  |             |               | Reflected     |             |               |
|--------------------|---------------|-------------|---------------|---------------|-------------|---------------|---------------|-------------|---------------|
|                    | P0 (kPa)      | t+ (ms)     | I (kPa-ms)    | P0 (kPa)      | t+ (ms)     | I (kPa-ms)    | P0 (kPa)      | t+ (ms)     | I (kPa-ms)    |
| <b>Pilot study</b> |               |             |               |               |             |               |               |             |               |
| B+H (n=6)          | 101.20 ± 1.13 | 3.31 ± 0.03 | 136.37 ± 1.11 | 108.49 ± 1.22 | 3.29 ± 0.03 | 137.46 ± 1.12 | 153.13 ± 2.45 | 3.45 ± 0.01 | 171.17 ± 1.64 |
| NOM 0' (n=3)       | 111.70 ± 0.65 | 3.33 ± 0.02 | 144.13 ± 0.65 | 119.75 ± 0.70 | 3.31 ± 0.02 | 145.29 ± 0.65 | 166.37 ± 5.00 | 3.48 ± 0.01 | 180.37 ± 0.95 |
| <b>Main study</b>  |               |             |               |               |             |               |               |             |               |
| B+H (n=10)         | 108.93 ± 1.22 | 3.32 ± 0.01 | 140.23 ± 0.77 | 116.78 ± 1.31 | 3.30 ± 0.01 | 141.35 ± 0.78 | 161.17 ± 1.87 | 3.48 ± 0.03 | 178.51 ± 1.21 |
| NOM 15' (n=10)     | 107.96 ± 1.11 | 3.27 ± 0.02 | 140.54 ± 0.70 | 115.74 ± 1.19 | 3.25 ± 0.02 | 141.67 ± 0.70 | 162.84 ± 1.36 | 3.49 ± 0.03 | 178.82 ± 1.07 |
| NOM 60' (n=10)     | 108.47 ± 1.01 | 3.30 ± 0.03 | 141.00 ± 0.55 | 116.29 ± 1.09 | 3.28 ± 0.03 | 142.13 ± 0.56 | 158.48 ± 2.16 | 3.49 ± 0.03 | 178.34 ± 1.07 |

103

104 **Table S3. Blast wave parameters from pilot and main (treatment) studies.** Legend: B + H  
105 group = blast + hemorrhage; NOM group = nomacopan *i.v.* + blast + hemorrhage + nomacopan  
106 *s.c.*; P0 (peak pressure) in kPa (the kilopascal, a unit of pressure); t+ [the positive-pressure phase  
107 duration in milliseconds (ms)]; I [impulse (kPa-ms)].

108

109

110

111

112

113

114

115

116

117

Table S4

| Parameters                       |                  | 0              | 15min           | 1h               | 4h             | 11h             | 25hs/EOS         |
|----------------------------------|------------------|----------------|-----------------|------------------|----------------|-----------------|------------------|
| Arterial pH                      | B+H (n=10)       | 7.44 ± 0.02    | 7.25 ± 0.07#    | 7.30 ± 0.16#     | 7.07 ± 0.37#   | 7.44 ± 0.06     | 7.40 ± 0.03      |
|                                  | nomacopan (n=10) | 7.44 ± 0.03    | 7.33 ± 0.08#    | 7.38 ± 0.16      | 7.41 ± 0.16*   | 7.44 ± 0.10     | 7.47 ± 0.09      |
| Arterial pCO <sub>2</sub> (mmHg) | B+H (n=10)       | 51.56 ± 4.49   | 79.16 ± 14.07#  | 51.71 ± 17.51    | 68.24 ± 24.35  | 54.17 ± 7.54    | 50.30 ± 8.90     |
|                                  | nomacopan (n=10) | 51.06 ± 4.20   | 64.75 ± 10.90#* | 46.82 ± 18.49#   | 50.00 ± 12.21  | 52.06 ± 6.27    | 40.64 ± 8.56#    |
| Arterial HCO <sub>3</sub> (mmHg) | B+H (n=10)       | 34.72 ± 2.00   | 34.57 ± 1.89    | 23.30 ± 5.55#    | 32.25 ± 7.26   | 36.27 ± 0.60    | 24.98 ± 8.65#    |
|                                  | nomacopan (n=10) | 34.59 ± 1.32   | 34.07 ± 1.34    | 26.10 ± 2.28#    | 31.13 ± 5.09#  | 33.45 ± 2.46    | 28.88 ± 2.43#    |
| Chloride (mmol/L)                | B+H (n=10)       | 100.20 ± 1.32  | 100.70 ± 1.34   | 103.60 ± 2.59#   | 104.38 ± 3.07# | 103.00 ± 4.69   | 103.00 ± 2.65    |
|                                  | nomacopan (n=10) | 101.56 ± 1.67  | 99.78 ± 1.86    | 101.38 ± 3.54    | 102.67 ± 2.40  | 101.57 ± 2.51   | 105.71 ± 2.36#   |
| iCa (mmol/L)                     | B+H (n=10)       | 1.37 ± 0.03    | 1.44 ± 0.05#    | 1.35 ± 0.04      | 1.25 ± 0.10#   | 1.34 ± 0.02     | 1.38 ± 0.07      |
|                                  | nomacopan (n=10) | 1.35 ± 0.04    | 1.42 ± 0.06#    | 1.35 ± 0.05      | 1.29 ± 0.05#   | 1.34 ± 0.05     | 1.37 ± 0.05      |
| Glucose (mg/dL)                  | B+H (n=10)       | 188.10 ± 20.95 | 269.00 ± 50.14# | 375.56 ± 98.61#  | 131.71 ± 93.87 | 157.00 ± 6.08   | 250.33 ± 41.49   |
|                                  | nomacopan (n=10) | 180.00 ± 27.87 | 263.80 ± 51.39# | 366.88 ± 127.97# | 170.44 ± 52.22 | 147.75 ± 19.00# | 153.38 ± 24.33#* |

118

119 **Table S4. Blood chemistry changes in control and nomacopan treatment (NOM\_15') groups.**

120 Legend: Data are expressed as mean ±SD; statistical analyses were performed by Mann-Whitney

121 U test; \*= $p < 0.05$  vs. the vehicle (saline); #= $p < 0.05$  vs. baseline (0 hours).

122

123
